# Supplementary material for: Pyridal[2,1,3]thiadiazole as strong electron-withdrawing and less sterically-hindered acceptor for highly efficient donor–acceptor type NIR materials
Source: Royal Society of Chemistry journal article supplement (doi:10.1039/c7tc03978f), 2017-01-01
Supplement: c7tc03978f1.pdf [file c7tc03978f1.pdf]

## Supporting Information

### **Pyridal[2,1,3]thiadiazole as Strong Electron-Withdrawing and Less Steric Hindrance Acceptor For Highly Efficient Donor-Acceptor type NIR Materials**

*Jianxia Jiang, Xianglong Li, Muddasir Hanif, Jiadong Zhou, Dehua Hu, \* Shijian Su, Zengqi Xie, Yu Gao, Bing Yang, Yuguang Ma\**

#### **Table of Contents**

**Section 1. Materials and Method**

**Section 2. Thermal Properties**

**Section 3. Photophysical Properties**

**Section 4. Solvatochromic effect and Transient PL decay**

**Section 5. Single crystal X-ray diffraction data and DFT calculations analysis**

**Section 6. Electroluminescence Performances**

## Section 1. Materials and Method

**General Methods:** All solvents and reagents used for synthesis were purchased from Aldrich or Acros and used as received without further purification.

$^1\text{H}$  and  $^{13}\text{C}$  NMR data were collected with a Bruker AVANCE Digital 600 MHz NMR workstation. All data were using tetramethylsilane (TMS) as the internal standard. Matrix-Assisted Laser Desorption Ionization time-of-flight (MALDI-TOF) mass spectra were performed on a Bruker Autoflex III Smartbeam. For differential scanning calorimetry (DSC), a Netzsch DSC 209 apparatus with a heating and cooling rate of  $10\text{ }^\circ\text{C min}^{-1}$  under  $\text{N}_2$  flow was used. Thermogravimetric analyses (TGA) were performed on a Netzsch TG 209 apparatus under a  $\text{N}_2$  flow at a heating rate of  $10\text{ }^\circ\text{C min}^{-1}$ . Cyclic voltammetry (CV) was performed on a CHI760D electrochemical workstation. The measurements were used Glassy Carbon working electrode and Pt wire counter electrode at a scanning rate of  $50\text{ mV s}^{-1}$  against a  $\text{Ag/Ag}^+$  ( $0.01\text{ M}$  of  $\text{AgNO}_3$  in acetonitrile) reference electrode in a nitrogen-saturated anhydrous acetonitrile and dichloromethane (DCM) solution of  $0.1\text{ mol L}^{-1}$   $\text{Bu}_4\text{NPF}_6$  as the electrolyte. The measurement was calibrated against ferrocene/ferrocenium redox system. Absorption spectra were recorded on a UV-3600 spectrophotometer from Shimadzu. Photoluminescence (PL) spectra were received on a Jobin-Yvon spectrofluorometer.

**Device Fabrication and Characterization:** The ITO-coated glass substrates used as anode were cleaned with acetone, deionized water and isopropanol in an ultrasonic bath, and then dried in an oven at  $90\text{ }^\circ\text{C}$ . The devices were fabricated by vacuum evaporation of the organic and metal materials onto the ITO coated glass substrates at  $5 \times 10^{-4}\text{ Pa}$ . Before the fabrication of the devices, the compounds were further purified by sublimation. The devices were constructed by evaporation organic layers with a deposition rate of the  $1.0\text{-}2.0\text{ \AA s}^{-1}$ . The deposition rate of LiF and Al were  $0.1\text{ \AA s}^{-1}$  and  $4.0\text{ \AA s}^{-1}$ , respectively. The thickness of the deposited material was monitored by an oscillating quartz thickness monitor. Electroluminescence (EL) spectra and CIE coordinates were measured using a PR705 spectra

scan spectrometer. The luminance and current density versus driving-voltage characteristics were measured by combining the spectrometer CS200 with a Keithley model 2420 programmable voltage-current source meter. All measurements were carried out under ambient conditions and at room temperature.

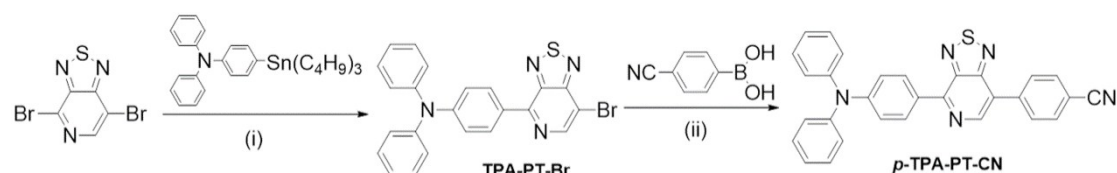

(i)  $\text{Pd}(\text{PPh}_3)_4$ , THF,  $80^\circ\text{C}$ , 36h.

(ii)  $\text{Pd}(\text{PPh}_3)_4$ , 2M  $\text{K}_2\text{CO}_3$ , Methanol, Toluene(1:1:2),  $90^\circ\text{C}$ , 24h.

**Scheme S1.** Chemical structures and synthetic route of *p*-TPA-PT-CN.

### Synthesis of TPA-PT-Br

4,7-dibromo-[1,2,5]thiadiazolo[3,4-*c*]pyridine (0.50 g, 1.71 mmol), *N,N*-diphenyl-4-(tributylstannyl)aniline (0.90 g, 1.69 mmol),  $\text{Pd}(\text{PPh}_3)_4$  (0.20 g, 10 mol%), 20 ml THF were first mixed. The reaction mixture was stirred at  $90^\circ\text{C}$  for 36h under a nitrogen atmosphere. After cooling to room temperature, the mixture was washed by water and extracted with chloroform consecutively. The organic phase was collected and further dried with anhydrous  $\text{MgSO}_4$ . After evaporation of the solvent, the residue was purified by column chromatography on silica gel using a petroleum ether/dichloromethane mixture (3:1), and the pure product of compound TPA-PT-Br was finally obtained (0.31 g, yield 40 %).  $^1\text{H}$  NMR ( $\text{CDCl}_3$ , 600 MHz,  $\delta$ ): 8.67 (s, 1H, Py-H), 8.42-8.40 (d, 2H,  $J = 8.41$  Hz, Ar-H), 7.26-7.23 (t, 4H,  $J = 7.25$  Hz, Ar-H), 7.14-7.09 (m, 6H, Ar-H), 7.06-7.04 (t, 4H,  $J = 7.05$  Hz, Ar-H). MALDI-TOF-MS ( $m/z$ ):  $\text{C}_{23}\text{H}_{15}\text{N}_4\text{SBr}$ , 459.10.

### Synthesis of *p*-TPA-PT-CN

TPA-PT-Br (0.55 g, 1.20 mmol), 4-Cyanophenylboronic acid (0.25 g, 1.80 mmol),  $\text{Pd}(\text{PPh}_3)_4$  (0.14g, 10 mol%),  $\text{K}_2\text{CO}_3$  (1.38 g, 2 mmol), distilled water (5 mL), methanol (5 mL), and toluene (10 mL) were first mixed. The mixture was cooled and deoxidized under a nitrogen atmosphere for 3 times. Then the reaction mixture was stirred at  $90^\circ\text{C}$  for 36 h under a nitrogen

atmosphere. After cooling to room temperature, the mixture was washed by water and extracted with chloroform consecutively. The organic phase was collected and further dried with anhydrous  $\text{MgSO}_4$ . After evaporation of the solvent, the residue was purified by column chromatography on silica gel using a petroleum ether/dichloromethane mixture (2:1), and the pure product of compound *p*-TPA-PT-CN was finally obtained. (0.53 g, 1.09 mmol, yield 91%).  $^1\text{H}$  NMR ( $\text{CDCl}_3$ , 600 MHz,  $\delta$ ): 8.72 (s, 1H, Py-H), 8.51-8.49 (d, 2H,  $J$  = 8.50 Hz, Ar-H), 8.09-8.08 (d, 2H,  $J$  = 8.08 Hz, Ar-H), 7.78-7.76 (d, 2H,  $J$  = 7.77 Hz, Ar-H), 7.27-7.24 (t, 4H,  $J$  = 7.25 Hz, Ar-H), 7.15-7.11 (m, 6H,  $J$  = 7.13 Hz, Ar-H), 7.07-7.04 (t, 2H,  $J$  = 7.05 Hz, Ar-H).  $^{13}\text{C}$  NMR ( $\text{CDCl}_3$ , 600 MHz,  $\delta$ ): 155.38, 152.07, 149.50, 148.60, 145.80, 142.47, 138.35, 131.53, 130.15, 128.50, 124.66, 123.20, 122.75, 120.19, 117.71, 112.80, 110.99. MALDI-TOF-MS ( $m/z$ ):  $\text{C}_{30}\text{H}_{19}\text{N}_5\text{S}$ , 481.0611. Elemental analysis calculated [%] for  $\text{C}_{30}\text{H}_{19}\text{N}_5\text{S}$ : C, 74.82; H, 3.98; N, 14.54; S, 6.66, found: C, 74.53; H, 3.93; N, 14.63; S, 6.63

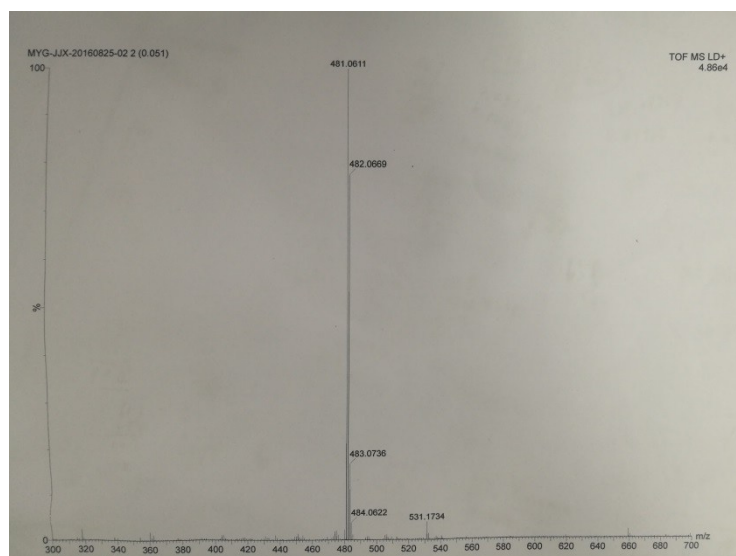

Figure S1 The MALDI-TOF-MS ( $m/z$ ) graph of *p*-TPA-PT-CN.

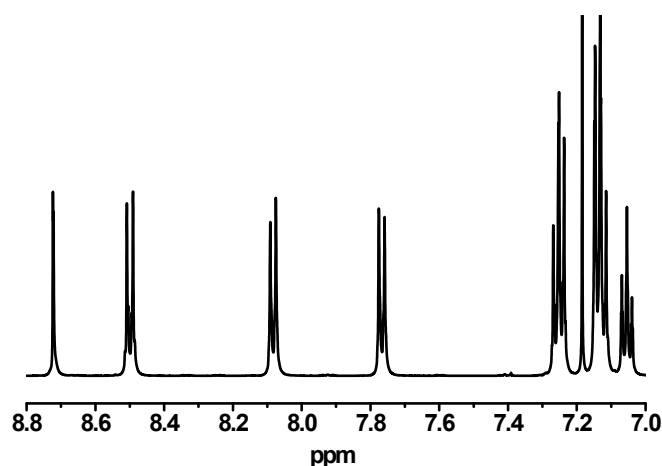

Figure S2 The  $^1\text{H}$  NMR ( $\text{CDCl}_3$ , 600 MHz) graph of *p*-TPA-PT-CN.

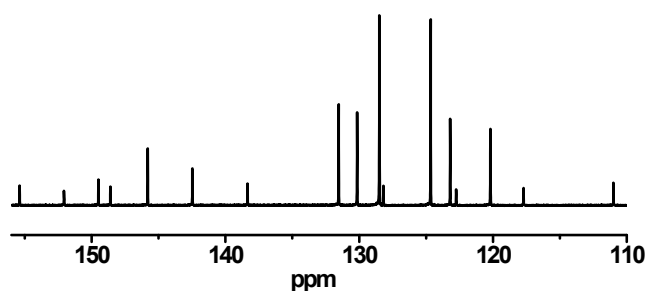

Figure S3 The  $^{13}\text{C}$  NMR ( $\text{CDCl}_3$ , 600 MHz) graph of *p*-TPA-PT-CN.

## Section 2. Thermal Properties

The thermal stability of *p*-TPA-PT-CN were characterized by Differential scanning calorimetry (DSC) and Thermogravimetric analysis (TGA). As shown Figure S1a, the glass-transition temperature ( $T_g$ ) of *p*-TPA-PT-CN is determined to be 87 °C, from the DSC traces during the second heating scans. As temperature elevation, the material appeared an exotherm at 153 °C caused by crystallization ( $T_c$ ), followed by endotherm at 222 °C associated with melting ( $T_m$ ) for *p*-TPA-PT-CN. Obviously, the enhanced inductive electron-withdrawing effect has a noticeable impact on the thermal properties of the materials. As we known, the thermal properties of the materials are determined by factors including interaction energies, electric

dipoles, molecular symmetry, et.al.

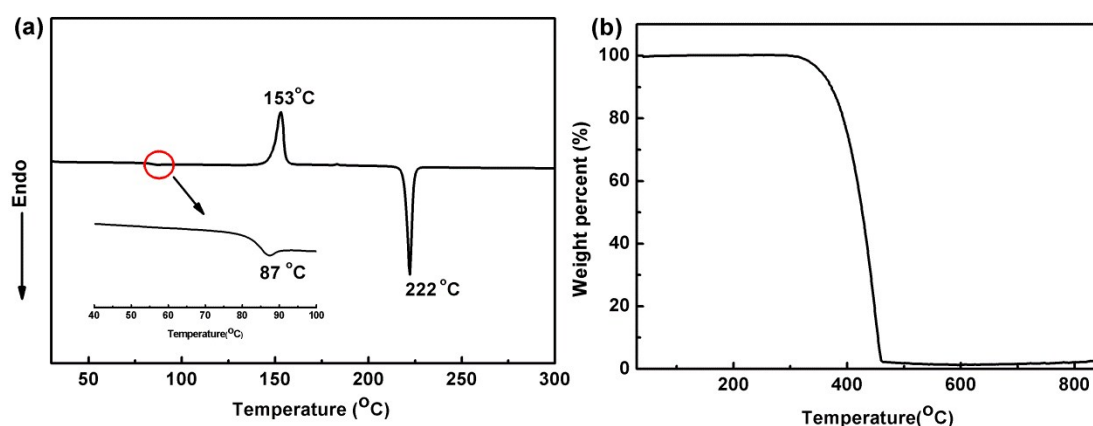

**Figure S4.** a) Second heating DSC traces of *p*-TPA-PT-CN in the temperature range of 40 °C and 300 °C (the insert figure is second heating DSC traces of the material in the temperature range of 40 °C and 100 °C); b) TGA thermographs of *p*-TPA-PT-CN.

It is possible that such improvement of thermal properties could be ascribed to increased more and/or stronger intermolecular interactions in the solid state arisen from the increased polarity of cyano-substituent. Benefitted from the same reason, the *p*-TPA-PT-CN exhibited high decomposition temperature ( $T_d$ , corresponding to 5% weight loss, 352 °C) evidently, the cyano-substituent significantly improve the thermal stability of the D-A materials, which is an important factor to get appreciable device performance.

### Section 3. Photophysical Properties

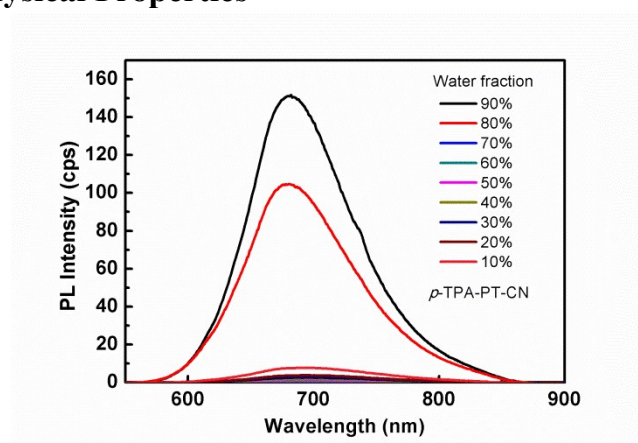

**Figure S5.** PL spectra of *p*-TPA-PT-CN (10<sup>-5</sup> M) in THF/water mixtures with different water fractions.

we measured the PL spectra of *p*-TPA-PT-CN in THF/water mixtures with different water fractions ( $f_w$ , Figure S4). The solutions showed very weak emission when the  $f_w$  is less than 80

vol%. As the  $f_w$  increase to 80 vol%, the emission of the solution dramatically enhanced, indicating *p*-TPA-PT-CN has aggregation-induced-emission (AIE) characteristic.

#### Section 4. Solvatochromic effect and transient PL decay

The influence of solvent environment on the optical property of our compounds can be understood using the Lippert-Mataga equation<sup>[1-2]</sup>, a model that describes the interactions between the solvent and the dipole moment of solute:

$$hc(v_a - v_f) = hc(v_a^0 - v_f^0) - \frac{2(\mu_e - \mu_g)^2}{a^3} f(\epsilon, n)$$

where  $f$  is the orientational polarizability of solvents,  $\mu_e$  is the excited-state dipole moment,  $\mu_g$  is the ground-state dipole moment;  $a$  is the solvent cavity (Onsager) radius (6.69 Å), derived from the Avogadro number ( $N$ ), molecular weight ( $M$ ), and density ( $d=1.0$  g/cm<sup>3</sup>);  $\epsilon$  and  $n$  are the solvent dielectric and the solvent refractive index, respectively;  $f(\epsilon, n)$  and  $a$  can be calculated respectively as follows:

$$f(\epsilon, n) = \frac{\epsilon - 1}{2\epsilon + 1} - \frac{n^2 - 1}{2n^2 + 1}, a = (3M/4N\pi d)^{1/3}$$

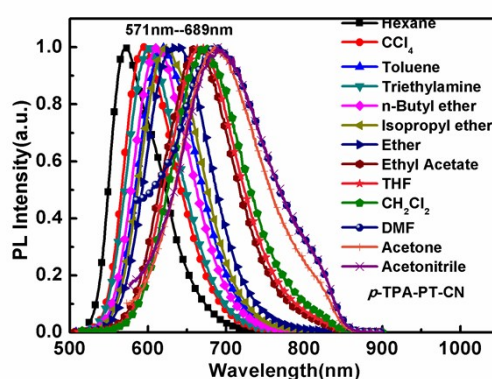

**Figure S6.** PL spectra of the *p*-TPA-PT-CN in different solvents with different polarity.

**Table S1.** Detailed photophysical data of *p*-TPA-PT-CN in different solvents.

| solvent            | $\Delta f$<br>[nm] | $\lambda_{ab}^{a)}$<br>[nm] | $\lambda_{em}^{b)}$<br>[nm] | Stokes<br>[cm <sup>-1</sup> ] | shift | PLQY <sup>c)</sup><br>[%] | $\epsilon^d)$<br>[10 <sup>4</sup> cm <sup>-1</sup> M <sup>-1</sup> ] |
|--------------------|--------------------|-----------------------------|-----------------------------|-------------------------------|-------|---------------------------|----------------------------------------------------------------------|
| Hexane             | 0.0012             | 505                         | 571                         | 2288                          |       | 90.9                      | 2.02                                                                 |
| Tetrachloromethane | 0.011              | 511                         | 595                         | 2762                          |       | 90.3                      | 1.39                                                                 |

|                    |       |     |     |      |      |      |
|--------------------|-------|-----|-----|------|------|------|
| Toluene            | 0.014 | 500 | 621 | 3896 | 81.2 | 1.91 |
| Triethylamine      | 0.048 | 501 | 599 | 3265 | 16.0 | 1.17 |
| n-Butyl ether      | 0.096 | 500 | 625 | 4000 | 80.1 | 2.09 |
| Isopropyl ether    | 0.145 | 498 | 613 | 3767 | 70.1 | 1.97 |
| Ether              | 0.167 | 494 | 639 | 4593 | 69.1 | 2.0  |
| Ethyl Acetate      | 0.2   | 486 | 660 | 5424 | 15.7 | 1.89 |
| tetrahydrofuran    | 0.21  | 491 | 668 | 5396 | 19.2 | 1.94 |
| dichloromethane    | 0.217 | 495 | 667 | 5209 | 16.4 | 1.78 |
| Dimethyl Formamide | 0.276 | 485 | 687 | 6062 | 0.8  | 1.74 |
| Acetone            | 0.284 | 481 | 685 | 6191 | 1.2  | 1.93 |
| Acetonitrile       | 0.305 | 477 | 689 | 6450 | 0.8  | 1.92 |

<sup>a)</sup>Absorption maximum; <sup>b)</sup> Emission maximum; <sup>c)</sup> Fluorescence quantum yield estimated by using a integrating sphere; <sup>d)</sup> Molar extinction coefficient.

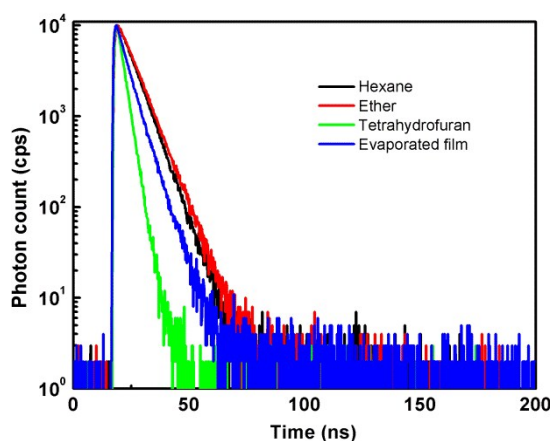

**Figure S7.** Transient PL decay profiles of the *p*-TPA-PT-CN in different solvents and films.

**Table S2.** Photophysical properties of *p*-TPA-PT-CN: quantum yields ( $\phi_F$ ), lifetime ( $\tau_F$ ), radiative ( $k_r$ ) and non-radiative ( $k_{nr}$ ) decay rates.

|                         | Hexane <sup>a</sup> | Ether <sup>a</sup> | Tetrahydrofuran <sup>a</sup> | Evaporated film |
|-------------------------|---------------------|--------------------|------------------------------|-----------------|
| $\phi_F^b$              | 0.91                | 0.69               | 0.29                         | 0.28            |
| $\tau_F$ [ns]           | 6.33                | 6.82               | 2.72                         | 4.96            |
| $k_r/10^7[s^{-1}]^c$    | 14.36               | 10.13              | 7.06                         | 5.56            |
| $k_{nr}/10^7[s^{-1}]^c$ | 1.44                | 4.53               | 29.71                        | 14.60           |

<sup>a)</sup>concentration of  $1.0 \times 10^{-5}$  M; <sup>b)</sup>Absolute quantum yields determined with a calibrated integrating sphere system; <sup>c)</sup> $k_r$  and  $k_{nr}$  were obtained by  $k_r = \phi_F/\tau_F$ ;  $\tau_F^{-1} = k_r + k_{nr}$ .

## Section5. Single crystal X-ray diffraction data and DFT calculations analysis

Single crystal of *p*-TPA-PT-CN were prepared by the slow diffusion of the CH<sub>3</sub>OH (poor solvent) into the CHCl<sub>3</sub> (good solvent) solution at room temperature. The diffraction experiments

were carried out on a Xcalibur, Eos, Gemini diffractometer equipped with a CuK $\alpha$  or MoK $\alpha$  and Control Software using the RAPID AUTO at 293 ( $\pm$ 2) °C. Empirical absorption corrections were applied multi-scan. The structures were solved with direct methods and refined with a full-matrix least-squares technique using the SHELXL-97 programs, respectively. The space groups were determined from the systematic absences and their correctness was confirmed by successful solution and refinement of structures. Anisotropic thermal parameters were refined for all the non-hydrogen atoms. The hydrogen atoms were added in idealized position and refined with isotropic displacement. Crystal data refinement conditions and experimental details are tabulated in table S3.

CCDC 1500956 contains the supplementary crystallographic data for this paper. These data are provided free of charge by The Cambridge Crystallographic Data Centre.

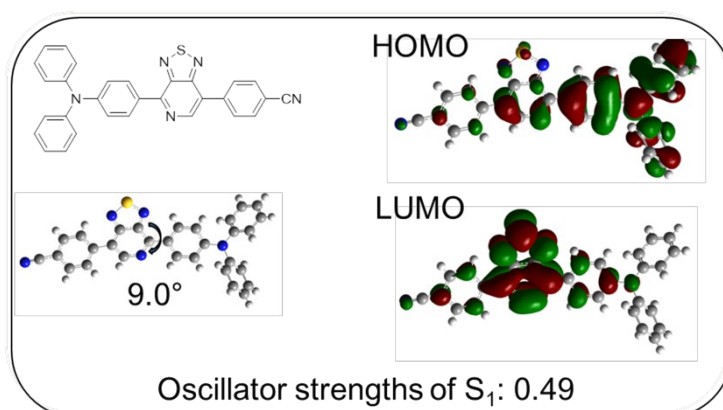

**Figure S8.** X-ray crystal structures and DFT calculations analysis of *p*-TPA-PT-CN.

**Table S3.** Crystallographic data and structure refinement for *p*-TPA-PT-CN.

|                       |                                                  |
|-----------------------|--------------------------------------------------|
| Identification code   | <i>p</i> -TPA-PT-CN                              |
| Empirical formula     | C <sub>30</sub> H <sub>19</sub> N <sub>5</sub> S |
| Formula weight        | 481.56                                           |
| Temperature/K         | 293(2)                                           |
| Crystal system        | monoclinic                                       |
| Space group           | C2/c                                             |
| <i>a</i> /Å           | 46.21(2)                                         |
| <i>b</i> /Å           | 6.9886(10)                                       |
| <i>c</i> /Å           | 24.593(13)                                       |
| $\alpha$ /°           | 90.00                                            |
| $\beta$ /°            | 144.02(11)                                       |
| $\gamma$ /°           | 90.00                                            |
| Volume/Å <sup>3</sup> | 4666(3)                                          |

|                                                |                                    |
|------------------------------------------------|------------------------------------|
| Z                                              | 8                                  |
| $\rho_{\text{calc}}/\text{g}/\text{cm}^3$      | 1.371                              |
| $\mu/\text{mm}^{-1}$                           | 1.465                              |
| F(000)                                         | 2000.0                             |
| Radiation                                      | CuK $\alpha$ ( $\lambda=1.54184$ ) |
| 2 $\theta$ range for data collection/ $^\circ$ | 6.52 to 134.5                      |
| Reflections collected                          | 7825                               |
| Data/restraints/parameters                     | 4194/0/326                         |
| Goodness-of-fit on F <sup>2</sup>              | 0.994                              |
| Final R indexes [ $I \geq 2\sigma(I)$ ]        | $R_1 = 0.0686$ , $wR_2 = 0.1527$   |
| Final R indexes [all data]                     | $R_1 = 0.1467$ , $wR_2 = 0.2366$   |
| Largest diff. peak/hole / $e \text{ \AA}^{-3}$ | 0.36/-0.41                         |

**Section6. Electroluminescence Performances**

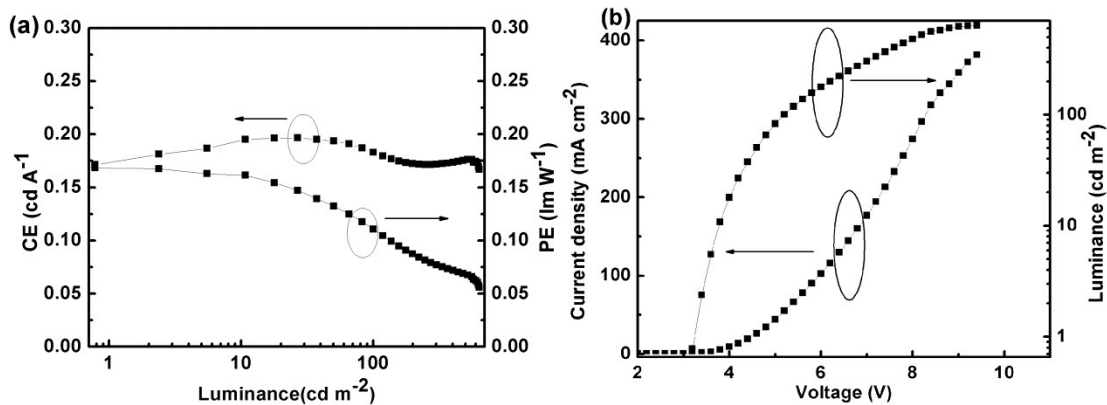

**Figure S9.** Curves of luminous efficiency versus current density (a) and the J–V–L characteristics (b) of NIR device based on the material.

**TableS4.** The luminous efficiency of organic small-molecule NIR emitters.
